# Supplementary material
Source: PubMed Central journal article supplement (PMC5234680)
Supplement: NIHMS819223-supplement-Supplementary_Materials__Figure1.pdf [file NIHMS819223-supplement-Supplementary_Materials__Figure1.pdf]

Name:  
MRN:  
Date:  
Study Number:

## PRE-BIOPSY: Patient

Laser acupuncture study

1. How **anxious** do you feel right **now**? Please circle a number

|               |   |        |   |        |   |   |   |       |   |                     |
|---------------|---|--------|---|--------|---|---|---|-------|---|---------------------|
| 0             | 1 | 2      | 3 | 4      | 5 | 6 | 7 | 8     | 9 | 10                  |
| Not at<br>all |   | Little |   | Medium |   |   |   | A lot |   | Worst<br>imaginable |

2. How much **pain** do you feel right **now**? Please circle a number below:

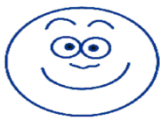

**0**  
No  
Hurt

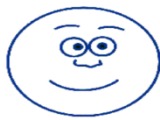

**2**  
Hurts  
Little Bit

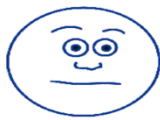

**4**  
Hurts Little  
More

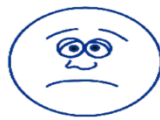

**6**  
Hurts  
Even More

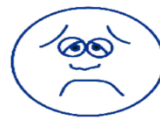

**8**  
Hurts  
Whole Lot

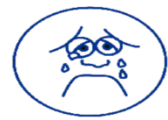

**10**  
Hurts  
Worst
