# Supplementary material
Source: PubMed Central journal article supplement (PMC5234680)
Supplement: NIHMS819223-supplement-Supplementary_Materials__Figure2.pdf [file NIHMS819223-supplement-Supplementary_Materials__Figure2.pdf]

Name:  
MRN:  
Date:  
Study Number:

## POST-BIOPSY: Patient

Laser acupuncture study

1. How **anxious** do you feel right **now**? Please circle a number

|            |   |        |   |        |   |   |   |       |   |                  |
|------------|---|--------|---|--------|---|---|---|-------|---|------------------|
| 0          | 1 | 2      | 3 | 4      | 5 | 6 | 7 | 8     | 9 | 10               |
| Not at all |   | Little |   | Medium |   |   |   | A lot |   | Worst imaginable |

2. How much **pain** do you feel right **now**? Please circle a number below:

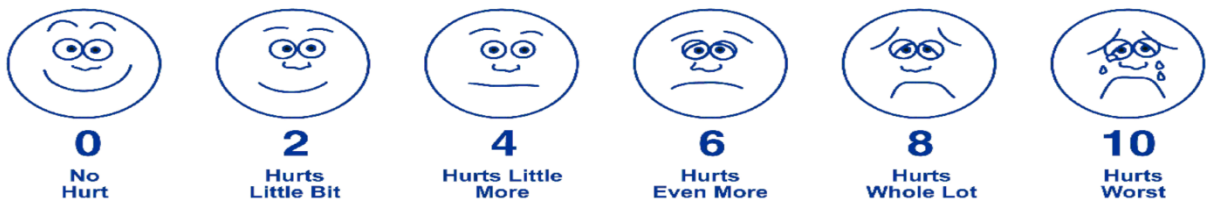

3. How much **pain** did you feel **during** the biopsy? Please circle a face or number.



4. Please describe your pain, if you had pain.

- Sharp and locatable
- Vague and diffuse
- Sensation of pressure
- Burning pain
- Other: \_\_\_\_\_

5. Where was the pain located, if you had pain?

- Your back
- Your abdomen in general
- Exactly on the biopsy site
- Somewhere else: \_\_\_\_\_

6. Did you have any of the following? May circle more than one.
- a. Sharp pain
  - b. Nausea
  - c. Sleepiness
  - d. Other: \_\_\_\_\_
  - e.

7. If you've had a biopsy in the past, was this experience
- a. Better
  - b. The same
  - c. Worse

8. If you've had a biopsy in the past, was the pain you felt TODAY
- a. Better
  - b. The same
  - c. Worse

9. Do you think you received real laser acupuncture today? Circle one.
- Yes                      No

10. Would you want to have laser acupuncture in the future? Circle one.
- Yes                      No

11. Would you recommend laser acupuncture to someone else having a kidney biopsy? Circle one.
- Yes                      No

12. Do you think laser acupuncture could be helpful for other types of procedures? Circle one.
- Yes                      No

If so, what type of procedure? \_\_\_\_\_

13. What could we do to make this experience better?
