# Supplementary material
Source: PubMed Central journal article supplement (PMC5234680)

Name:  
MRN:  
Date:  
Study Number:

## PRE-BIOPSY: Parent

Laser acupuncture study

1. How **anxious** do **you** feel right **now**? Please circle a number:

|               |   |        |   |   |        |   |   |       |   |                     |
|---------------|---|--------|---|---|--------|---|---|-------|---|---------------------|
| 0             | 1 | 2      | 3 | 4 | 5      | 6 | 7 | 8     | 9 | 10                  |
| Not at<br>all |   | Little |   |   | Medium |   |   | A lot |   | Worst<br>imaginable |

2. How **anxious** does **your child** feel right **now**? Please circle a number:

|               |   |        |   |   |        |   |   |       |   |                     |
|---------------|---|--------|---|---|--------|---|---|-------|---|---------------------|
| 0             | 1 | 2      | 3 | 4 | 5      | 6 | 7 | 8     | 9 | 10                  |
| Not at<br>all |   | Little |   |   | Medium |   |   | A lot |   | Worst<br>imaginable |

3. Is **your child** in **pain** right **now**? Please circle a number:

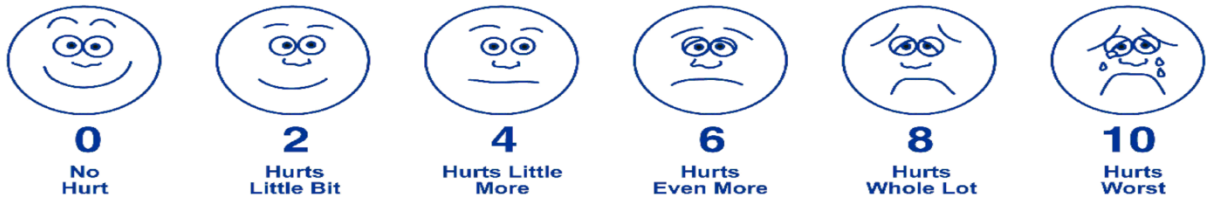

Supplement: NIHMS819223-supplement-Supplementary_Materials__Figure3.pdf [file NIHMS819223-supplement-Supplementary_Materials__Figure3.pdf]
