# Supplementary material
Source: PubMed Central journal article supplement (PMC5234680)
Supplement: NIHMS819223-supplement-Supplementary_Materials__Figure4.pdf [file NIHMS819223-supplement-Supplementary_Materials__Figure4.pdf]

Name:  
MRN:  
Date:  
Study Number:

## POST-BIOPSY: Parent

Laser acupuncture study

1. How **anxious** do **you** feel right **now**? Please circle a number:

|               |   |        |   |   |        |   |   |       |   |                     |
|---------------|---|--------|---|---|--------|---|---|-------|---|---------------------|
| 0             | 1 | 2      | 3 | 4 | 5      | 6 | 7 | 8     | 9 | 10                  |
| Not at<br>all |   | Little |   |   | Medium |   |   | A lot |   | Worst<br>imaginable |

2. How **anxious** does **your child** feel right **now**? Please circle a number:

|               |   |        |   |   |        |   |   |       |   |                     |
|---------------|---|--------|---|---|--------|---|---|-------|---|---------------------|
| 0             | 1 | 2      | 3 | 4 | 5      | 6 | 7 | 8     | 9 | 10                  |
| Not at<br>all |   | Little |   |   | Medium |   |   | A lot |   | Worst<br>imaginable |

3. Is **your child** in **pain** right **now**? Please circle a number:

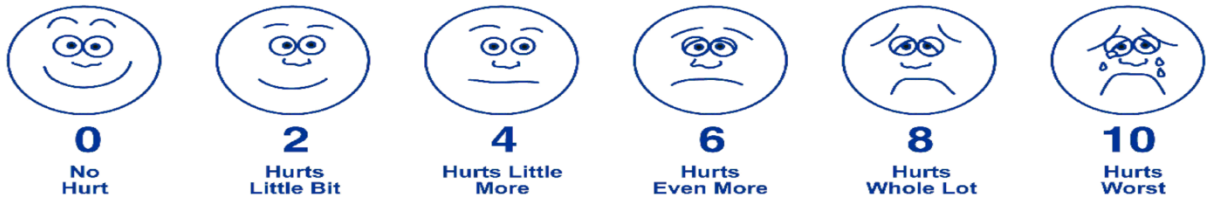

4. If you were present, do you think **your child** had **pain during** the biopsy.  
Please circle a number, if yes:

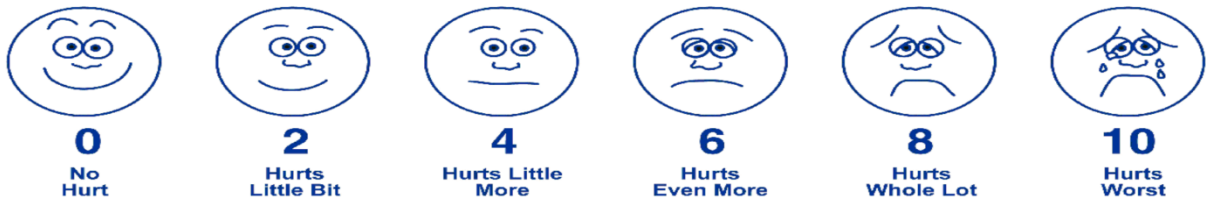

5. If your child has had a biopsy in the past, was this experience
- Better
  - The same
  - Worse
6. If your child has had a biopsy in the past, was the pain he/she felt TODAY
- Better
  - The same
  - Worse
7. Do you think your child received real laser acupuncture today? Circle one.
- Yes                      No
8. Would you want your child to have laser acupuncture in the future? Circle one.
- Yes                      No
9. Would you recommend laser acupuncture to someone else having a kidney biopsy? Circle one.
- Yes                      No
10. Do you think laser acupuncture could be helpful for other types of procedures? Circle one.
- Yes                      No
- If so, what type of procedure? \_\_\_\_\_
11. What could we do to make this experience better?
